1 **Functional genomic analysis of corals from natural CO<sub>2</sub>-seeps reveals core molecular**  
2 **responses involved in acclimatization to ocean acidification**

3

4 Running head: Core coral molecular response to CO<sub>2</sub>-seeps

5

6 CD Kenkel<sup>1\*</sup>, A Moya<sup>2</sup>, J Strahl<sup>1,3</sup>, C Humphrey<sup>1</sup>, and LK Bay<sup>1</sup>

7

8 <sup>1</sup>Australian Institute of Marine Science, PMB No 3, Townsville MC, Queensland 4810,

9 Australia

10 <sup>2</sup>ARC Centre of Excellence for Coral Reefs Studies, James Cook University, Townsville,

11 Australia

12 <sup>3</sup>Carl von Ossietzky University of Oldenburg, Oldenburg, Germany

13 \*Corresponding author, email: [carly.kenkel@gmail.com](mailto:carly.kenkel@gmail.com) or [c.kenkel@aims.gov.au](mailto:c.kenkel@aims.gov.au); phone:

14 +61 07 4753 4268; fax: +61 07 4772 5852

15

16 **KEYWORDS:** *Acropora millepora*, *Symbiodinium*, RNA-seq, gene expression, carbon

17 dioxide, lipid metabolism, symbiosis, adaptation

18 **PAPER TYPE:** Primary Research Article

19

20

21

22

23

24

25

26

27

28

29

30

31 **ABSTRACT**

32

33 Little is known about the potential for acclimatization or adaptation of corals to ocean  
34 acidification and even less about the molecular mechanisms underpinning these processes.  
35 Here we examine global gene expression patterns in corals and their intracellular algal  
36 symbionts from two replicate population pairs in Papua New Guinea that have undergone  
37 long-term acclimatization to natural variation in pCO<sub>2</sub>. In the coral host, only 61 genes were  
38 differentially expressed in response to pCO<sub>2</sub> environment, but the pattern of change was  
39 highly consistent between replicate populations, likely reflecting the core expression  
40 homeostasis response to ocean acidification. Functional annotations highlight lipid  
41 metabolism and a change in the stress response capacity of corals as a key part of this  
42 process. Specifically, constitutive downregulation of molecular chaperones was observed,  
43 which may impact response to combined climate-change related stressors. Elevated CO<sub>2</sub> has  
44 been hypothesized to benefit photosynthetic organisms but expression changes of *in hospite*  
45 *Symbiodinium* in response to acidification were greater and less consistent among reef  
46 populations. This population-specific response suggests hosts may need to adapt not only to  
47 an acidified environment, but also to changes in their *Symbiodinium* populations that may not  
48 be consistent among environments. This process adds another challenging dimension to the  
49 physiological process of coping with climate change.

50

51

52

53

54

55

56

57

58

59

60

61

## 62 INTRODUCTION

63

64           Increasing atmospheric carbon dioxide concentration contributes to global warming  
65 and alters ocean carbonate chemistry in the process known as ocean acidification (Sabine *et*  
66 *al.*, 2004). Elevated atmospheric CO<sub>2</sub> increases the hydrogen ion concentration [H<sup>+</sup>], thereby  
67 reducing ocean pH. This excess H<sup>+</sup> reacts with carbonate ions [CO<sub>2</sub><sup>3-</sup>] to form bicarbonate  
68 [HCO<sub>3</sub><sup>-</sup>], lowering the saturation state of carbonate minerals, such as calcite and aragonite  
69 (Feely *et al.*, 2009). Many marine taxa rely on carbonate minerals to build their calcium  
70 carbonate [CaCO<sub>3</sub>] skeletons. Increasing H<sup>+</sup> and concomitant reductions in pH increase the  
71 potential for dissolution of present skeletons (van Woesik *et al.*, 2013). Simultaneous  
72 reductions in the bioavailability of carbonate ions also increase the difficulty of depositing  
73 new skeleton (Kleypas *et al.*, 1999). Ocean acidification has been predicted to have major  
74 consequences for marine calcifying organisms, such as reef-building corals through this  
75 combination of effects (Hoegh-Guldberg *et al.*, 2007).

76           Scleractinian corals form the basis of the most biodiverse marine ecosystems on the  
77 planet: tropical coral reefs (Caley & St John, 1996, Idjada & Edmunds, 2006). They also  
78 provide important ecosystem services, such as habitat for fisheries species and shore  
79 protection (Sheppard *et al.*, 2005). Consequently, investigation of coral responses to  
80 acidification has received substantial attention in recent years. The majority of empirical  
81 work has focused on relatively short-term (days to months) exposure of corals to simulated  
82 acidification in aquaria and the reported fitness consequences have been mixed. A recent  
83 meta-analysis found that for every unit decrease in the saturation state of aragonite, coral  
84 calcification declines by 15% on average, though individual studies report more significant  
85 declines or even increases (Chan & Connolly, 2013), which may be attributable to  
86 differences in tolerance among species (Albright, 2011, Erez *et al.*, 2011, Jokiel, 2011).

87           Natural CO<sub>2</sub>-seep environments provide an attractive alternative to aquarium-based  
88 experiments aimed at understanding coral resilience potential: no experimental manipulations  
89 are necessary and *in situ* populations have likely already undergone some level of  
90 acclimatization or adaptation to be able to inhabit low-pH environments. Work by Fabricius  
91 *et al.* (2011) on corals at volcanic CO<sub>2</sub>-seeps in Papua New Guinea (PNG) has provided  
92 support for the mixed effects observed in laboratory experiments. Naturally acidified  
93 environments drastically alter the coral community, but some species, like massive *Porites*,  
94 appear unaffected, while others, such as Acroporids, are significantly less common or even  
95 absent (Fabricius *et al.*, 2014). Population reductions *in situ*, combined with observations of

96 negative physiological impacts, including declines in calcification under elevated pCO<sub>2</sub>  
97 (Strahl *et al.*, 2015) strongly suggests that acidification imposes selection pressure on less  
98 resilient taxa, such as Acroporids. Consequently, *Acropora* spp. are predicted to be ecological  
99 ‘losers’ under future acidification scenarios (Schoepf *et al.*, 2013). However, the fact that  
100 some *Acropora* spp. can still be found in seep environments indicates that standing genetic  
101 variation for acidification tolerance may already exist within these less resilient species,  
102 similar to recent work in analogous natural systems investigating variation in coral thermal  
103 tolerance (D’Croz & Maté 2004, Kenkel *et al.*, 2013a, Oliver & Palumbi, 2011) and its  
104 mechanistic basis (Barshis *et al.*, 2013, Dixon *et al.*, 2015, Kenkel & Matz, 2016).

105 Transcriptome sequencing has become a powerful tool for investigating physiological  
106 plasticity and adaptive evolution in a changing environment and can provide insight into the  
107 mechanistic basis of population-level variation (DeBiasse & Kelly, 2016). We used RNA-  
108 seq to investigate the core genomic response underpinning long-term acclimatization to  
109 acidification in *Acropora millepora* populations in the PNG seep system. In addition to  
110 significant population declines and reduced rates of net calcification at CO<sub>2</sub>-seep sites  
111 compared to paired non-impacted reefs (Fabricius *et al.*, 2014, Strahl *et al.*, 2015), coral-  
112 associated microbial communities also differ significantly in this species. In particular, *A.*  
113 *millepora* at seep sites exhibit a 50% reduction in symbiotic *Endozoicomonas*, a putative  
114 mutualist and generally dominant component of the coral microbiome (Morrow *et al.*, 2015,  
115 Neave *et al.*, 2017). We evaluated global gene expression profiles in adult corals and their  
116 algal endosymbionts, *Symbiodinium* spp., from replicate pairs of control and seep  
117 environments at two different reefs in the PNG system: Dobu (control pH = 8.01, 368 µatm  
118 pCO<sub>2</sub>; seep pH = 7.72, 998 µatm pCO<sub>2</sub>) and Upa-Upasina (control pH = 7.98, 346 µatm  
119 pCO<sub>2</sub>; seep pH = 7.81, 624 µatm pCO<sub>2</sub>) (Fabricius *et al.*, 2014). We interpret consistent shifts  
120 in expression among seep-site populations in the two replicate reef systems to reflect the core  
121 molecular response involved in long-term acclimatization and/or adaptation to ocean  
122 acidification.

123

## 124 **METHODS**

125

### 126 *Sampling Collection and Processing*

127 Small tips of coral branches were collected individually from 15 *A. millepora* colonies  
128 each at the CO<sub>2</sub> seep and control sites of both Dobu and Upa-Upasina Reefs, Milne Bay  
129 Province, Papua New Guinea, at 3 m depth, under a research permit by the Department of

130 Environment and Conservation of Papua New Guinea as described previously (Fabricius *et*  
131 *al.*, 2014, Fabricius *et al.*, 2011). Samples were snap-frozen in liquid nitrogen within minutes  
132 of collection and maintained at temperatures <-50°C until further processing.

133 Samples were crushed in liquid nitrogen and total RNA was extracted individually  
134 from 59 samples using a slightly modified RNAqueous kit protocol (Ambion, Life  
135 Technologies), and DNase treated as in Kenkel *et al.* (2011). Briefly, samples homogenized  
136 in lysis buffer were centrifuged for 2 minutes at 16100 rcf to precipitate skeleton fragments  
137 and other insoluble debris and 700 µl of supernatant was used for extraction following the  
138 manufacturers' instructions, with one additional modification: in the final elution step, the  
139 same 25 µl of elution buffer was passed twice through the spin column to maximize the  
140 concentration of eluted RNA. RNA quality was assessed through gel electrophoresis and  
141 evaluated based on the presence of the ribosomal RNA bands. One µg of RNA per sample  
142 was prepared for tag-based RNA-seq as in (Lohman *et al.*, 2016, Meyer *et al.*, 2011), with  
143 modifications for sequencing on the Illumina HiSeq platform (e.g. different adapter  
144 sequences to be compatible with the different sequencing chemistry; full protocols available  
145 at: [https://github.com/z0on/tag-based\\_RNAseq](https://github.com/z0on/tag-based_RNAseq)).

146 Noonan *et al.* (2013) demonstrated with gel-based DGGE and direct Sanger  
147 sequencing that *Symbiodinium* types do not differ between corals found in CO<sub>2</sub> seep and  
148 control environments and that *Acropora millepora* host variants of clade C, closely related to  
149 C1 and C3, in the PNG seep system. To confirm this result, we mapped reads for each sample  
150 against a reference that included *A. millepora* concatenated to *Symbiodinium* clades A, B, C  
151 and D. More than 90% of *Symbiodinium* reads were assigned to clade C across all samples  
152 (Table S1). A parallel RFLP digest (Palstra, 2000, van Oppen *et al.*, 2001) of LSU types  
153 confirmed that all corals used hosted C1 (Fig. S1), however one sample from the Dobu CO<sub>2</sub>-  
154 seep also appeared to have some amplifiable level of D-type symbionts, therefore to be  
155 conservative, this sample was discarded from the *Symbiodinium* expression analysis dataset.

156

### 157 *Bioinformatic Processing*

158 A total of 59 libraries were sequenced on two lanes of the Illumina HiSeq2500 at the  
159 University of Texas at Austin Genome Sequencing and Analysis Facility. On average, 5.4  
160 million sequences were generated per library (range: 2.5-16.3 million), for a total of 316.8  
161 million raw reads. A custom perl script was used to discard duplicate reads sharing the same  
162 degenerate primer (i.e. PCR duplicates) and trim the 5'-Illumina leader sequence from  
163 remaining reads. The *fastx\_toolkit* ([http://hannonlab.cshl.edu/fastx\\_toolkit](http://hannonlab.cshl.edu/fastx_toolkit)) was used to

164 remove additional reads with a homo-polymer run of ‘A’  $\geq 8$  bases, retain reads with  
165 minimum sequence length of 20 bases, and quality filter, requiring PHRED quality of at least  
166 20 over 90% of the sequence. *Bowtie 2* (Langmead & Salzberg, 2012) was used to map  
167 filtered reads to a combined transcriptome reference: a concatenated *Acropora millepora*  
168 reference transcriptome (Moya *et al.*, 2012b) and a *Symbiodinium* Clade C reference  
169 transcriptome (Ladner *et al.*, 2012). Read counts were assembled by isogroup (i.e. groups of  
170 sequences putatively originating from the same gene, or with sufficiently high sequence  
171 similarity to justify the assumption that they serve the same function) for both the host and  
172 symbiont transcriptomes using a custom perl script, discarding reads mapping equally well to  
173 multiple isogroups (Dixon *et al.*, 2015). For the host transcriptome, on average, 811,704  
174 reads per library (range: 414,605 – 2,102,534) were mapped to 45,442 unique isogroups. For  
175 the symbiont transcriptome, 277,517 reads per library (range: 96,025 – 571,019) were  
176 mapped to 24,076 unique isogroups.

177

#### 178 *Statistical Analyses*

179 Analyses were carried out in the R statistical environment (R Development Core  
180 Team 2013). Outlier analyses were conducted using the package *arrayQualityMetrics*  
181 (Kauffmann *et al.*, 2009). Four outliers were identified in the coral host dataset, while only  
182 one was detected in the symbiont dataset. All outlier samples were discarded. Count data for  
183 the remaining host samples (Dobu-Seep = 14, Dobu-Control = 14, Upa-Upasina-Seep = 14,  
184 Upa-Upasina-Control = 13) and symbiont samples (Dobu-Seep = 14, Dobu-Control = 15,  
185 Upa-Upasina-Seep = 14, Upa-Upasina-Control = 15) were analyzed using the package  
186 *DESeq* (Anders & Huber, 2010). Dispersion estimates of raw counts were obtained by  
187 maximizing a Cox-Reid adjusted profile likelihood of a model specifying population origin  
188 and seep environment for each sample and the empirical dispersion value was retained for  
189 each gene. Low-expression genes were excluded from subsequent analyses by removing  
190 isogroups with read count standard deviations in the bottom 60% quantile of both datasets,  
191 which were identified as the filter statistics best satisfying the assumptions of independent  
192 filtering as implemented in the package *genefilter* (Gentleman *et al.*). This left 18,177 highly  
193 expressed isogroups in the coral host dataset and 9,629 isogroups in the symbiont dataset. In  
194 each dataset, expression differences were evaluated with respect to reef site (Upa-  
195 Upasina/Dobu), and pCO<sub>2</sub> environment (Seep/Control) and the interaction using a series of  
196 generalized linear models implemented in the function *fitNbinomGLMs*. Multiple test  
197 correction was applied using the method of Benjamini and Hochberg (1995). Analyses were

198 also repeated independently for each population to verify candidate gene significance with  
199 respect to seep environment.

200 Functional enrichment analyses were conducted using the package GO-MWU  
201 (Voolstra *et al.*, 2011) to identify over-represented gene ontology (GO) terms with respect to  
202 origin and seep environment using both the classical categorical test and a rank-based  
203 methodology (Dixon 2015). The package *made4* (Culhane *et al.*, 2005) was used to conduct a  
204 between-groups analysis of seep and control samples within each dataset to identify the most  
205 discriminatory genes in terms of differential expression between reef environments. A  
206 permutation test was used to evaluate whether there were significantly more differentially  
207 expressed genes in the symbiont dataset relative to the coral host dataset. Since FDR-  
208 correction is partially based on the number of tests conducted, we created 1,000 random  
209 9,629 gene subsets of the host 18,177 gene dataset and repeated FDR-correction on this  
210 reduced sample. We then compared the distribution of significant tests obtained in the  
211 subsample to the observed symbiont gene set to obtain an estimate of significance.

212

213

## 214 RESULTS

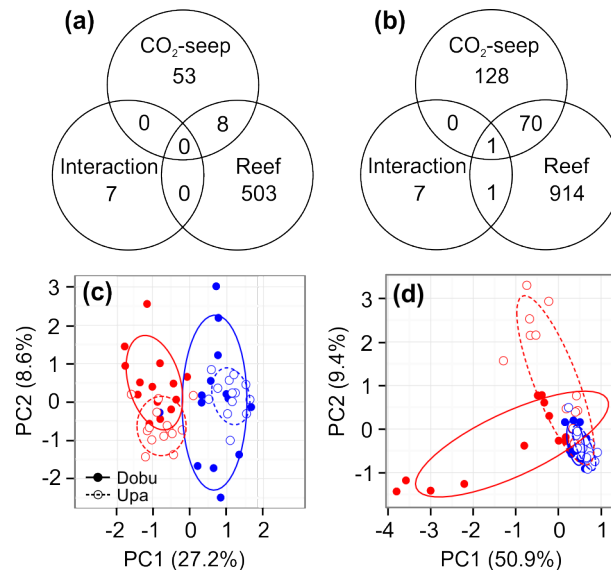

215

216

217

218

219

220

Figure 1. Venn diagrams of differentially expressed genes by factor (FDR-adjusted  $P < 0.1$ ) for host (a) and symbiont (b). Principal components analysis of top 50 most significantly differentially expressed genes by CO<sub>2</sub>-seep (red=seep, blue=control) and reef origin for host (c) and symbiont (d).

221 In total, 571 isogroups (genes) were differentially expressed at the FDR cut-off level  
222  $P_{\text{adj}} < 0.1$  in the coral host (3% of total, Fig. 1a). The grand majority of these differences were  
223 due to reef origin (Dobu vs. Upa-Upasina, 503 genes, Table S2). Only 61 genes were  
224 differentially regulated between corals originating from control and seep environments, 53 of  
225 which exhibited consistent differences irrespective of reef origin (Fig. 1a,c, Table S3).  
226 Significantly more expression changes were detected in *Symbiodinium* populations  
227 ( $P_{\text{permutation}} < 0.0001$ ) where a total of 1123 genes were differentially expressed ( $P_{\text{adj}} < 0.1$ , 12%  
228 of total, Fig 1b). Again, the majority of these changes were attributable to differences in reef  
229 origin (Table S4), but 201 genes exhibited altered expression in seep environments relative to  
230 controls (Fig. 1b, Table S5). Expression changes in symbionts were also less consistent  
231 between populations (Fig. 1d). The purpose of this study was to evaluate expression  
232 differences following lifelong acclimatization to elevated pCO<sub>2</sub> in corals. Therefore we focus  
233 on genes regulated with respect to seep environment, although differential expression  
234 patterns for genes responding to reef origin and associated functional enrichments can be  
235 found in the supplementary material (Tables S2, S4, Fig S2).

236

### 237 ***Differential expression of coral host genes by CO<sub>2</sub> seep environment***

238 Of the 61 genes showing common population-level responses to the CO<sub>2</sub>-seep  
239 environment, 53 exhibited consistent baseline expression levels between corals from the  
240 different reef locations (Fig. 1a, 'CO<sub>2</sub> seep'). Of these, 26 were upregulated and 27 were  
241 downregulated in CO<sub>2</sub>-seep environments. Roughly half (51%) of these genes have no  
242 annotation, and thus their functions cannot be determined. We report expression patterns  
243 among annotated candidates only but the data for all differentially expressed genes can be  
244 found in Table S3. We first consider individual candidate genes and then describe altered  
245 functional processes identified through enrichment analyses.

246

#### 247 *De novo candidate genes*

248 Among annotated genes significantly upregulated in seep-site corals, three associated  
249 with transcriptional regulation were also identified in a between-groups analysis as the most  
250 discriminatory genes between seep and control samples (Fig. 2a). Two are transcriptional  
251 regulators (ig19425, ig12770, 1.08-fold and 1.09-fold, respectively) and the third is a  
252 transcription factor in the basic leucine-zipper superfamily (ig10473, 1.2-fold). In the entire  
253 *A. millepora* transcriptome, 26 genes are annotated as 'transcriptional regulators' and another  
254 8 are bZIP transcription factors. A methyl-CpG binding transcriptional regulator (ig9532)



255 was also upregulated by 1.05-fold in corals from seep sites, but showed an additional effect  
 256 of host origin, with corals from Dobu having higher baseline expression than corals from  
 257 Upa-Upasina (Fig. 2c). This methyl-CpG binding regulator was one of only three genes with  
 258 this annotation in the entire *A. millepora* transcriptome, the other two of which (ig16785 and  
 259 ig21898) were not found in the final expression set. A transcriptional repressor in the hairy/E  
 260 (spl) family (ig7904) was among the most discriminatory genes and down-regulated in  
 261 response to seep environments by 1.16-fold (Fig. 2b), again suggesting some role for  
 262 transcriptional regulation, though 13 isogroups in the transcriptome also have this same  
 263 annotation.

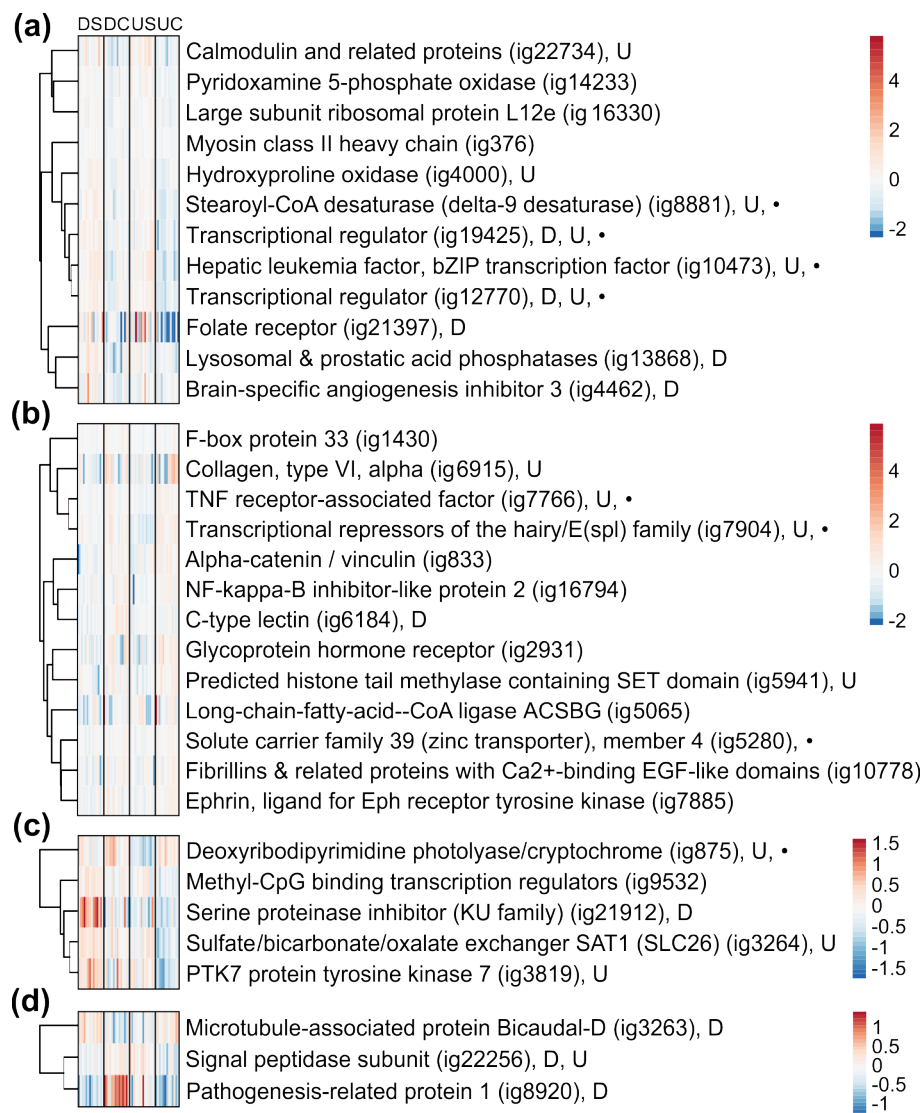

264  
 265 Figure 2. Heatmaps of annotated genes (FDR-adjusted P<0.1) in the coral  
 266 host that showed upregulation in response to seep environment (a),  
 267 downregulation in response to seep environment (b), an effect of reef  
 268 origin in addition to an effect of seep environment (c) or a reef origin x

269 seep environment interaction (d). D=FDR-adjusted  $P < 0.1$  in Dobu-only  
270 dataset; U=FDR-adjusted  $P < 0.1$  in Upa-Upasina-only dataset; •=Top  
271 discriminatory gene as identified via between-groups analysis for seep  
272 environment. DS=Dobu-seep, DC=Dobu-control, US=Upa-Upasina-seep,  
273 UC=Upa-Upasina-control.

274

275 A TNF receptor-associated factor (ig7766) is also a top discriminatory gene. This  
276 family, involved in the innate immune response, recently came to prominence given its  
277 putative role in the coral stress response (Barshis *et al.*, 2013). Its downregulation, together  
278 with an NF-kappa-B inhibitor (ig16794) and a c-type lectin (ig6184, Fig. 2b), highlight a  
279 potential impact of elevated pCO<sub>2</sub> on the innate immune response. However, 104, 49 and 143  
280 isogroups respectively have identical annotations in the *A. millepora* transcriptome.

281 An alpha-catenin/vinculin isoform (ig833), one of three genes with this annotation, is  
282 downregulated in seep site corals by 1.15-fold (Fig. 2b). The other two isoforms (ig1210 and  
283 ig21857) are not differentially expressed and not included in this expression dataset.

284 Additional cytoskeletal components including a collagen (ig6915) and fibrillin (ig10778) are  
285 also downregulated by 1.23 and 1.17-fold respectively, although these annotations are fairly  
286 common (86 and 372 isogroups in the transcriptome, respectively).

287

### 288 *Categorical Functional Enrichments*

289 A categorical functional enrichment analysis did not reveal any statistically  
290 significant candidates following FDR-correction. The top three ‘biological process’  
291 enrichments were ‘small molecule biosynthetic process’ (GO:0044283,  $P_{\text{Raw}} = 0.1$ ), ‘fatty  
292 acid metabolic process’ (GO:0006631,  $P_{\text{Raw}} = 0.3$ ) and ‘small molecule catabolic process’  
293 (GO:0044282,  $P_{\text{Raw}} = 0.3$ ), which resulted from a set of four candidate genes. Pyridoxamine  
294 5-phosphate oxidase (ig14233, upregulated by 1.06-fold in seep-site corals, GO:0044283,  
295 Fig. 2a), an enzyme catalyzing the rate-limiting step in vitamin B<sub>6</sub> metabolism is an  
296 annotation only assigned to one other gene in the host transcriptome (ig27779) that was not  
297 differentially expressed with respect to either seep environment or reef origin.

298 Hydroxyproline oxidase (ig4000, GO:0044283, GO:0044282, Fig 2a), hypothesized to play a  
299 role in activation of the apoptotic cascade (Cooper *et al.*, 2008), is also upregulated by 1.07-  
300 fold in seep site corals. The only other gene of the transcriptome with this annotation  
301 (ig1278) is differentially regulated with respect to reef origin, showing 1-fold upregulation in  
302 corals from Dobu ( $P_{\text{Reef}} < 0.1$ , Table S2).

303 The remaining two genes are primarily involved in fatty-acid metabolism. Stearoyl-  
 304 CoA desaturase (ig8881, GO:0044283, GO:0006631) is upregulated in seep sites by 1.15-  
 305 fold. There are only 5 isogroups in the transcriptome with this annotation, 3 occur in the final  
 306 expression list, but this isoform is the only one differentially expressed. The other candidate,  
 307 long-chain-fatty-acid—CoA ligase, or long-chain acyl-CoA synthetase (ig5065,  
 308 GO:0006631, GO:0044282), is downregulated by 1.19-fold and is one of only seven isoforms  
 309 with this annotation. One other isoform is differentially expressed with respect to reef origin,  
 310 with greater expression in Dobu-origin corals (ig3997,  $P_{\text{Reef}} < 0.1$ , Table S2), but remaining  
 311 isoforms (ig2622, ig2781, ig5009, ig5135, ig12633) were not differentially expressed.  
 312

### 313 Rank-based Functional Enrichments

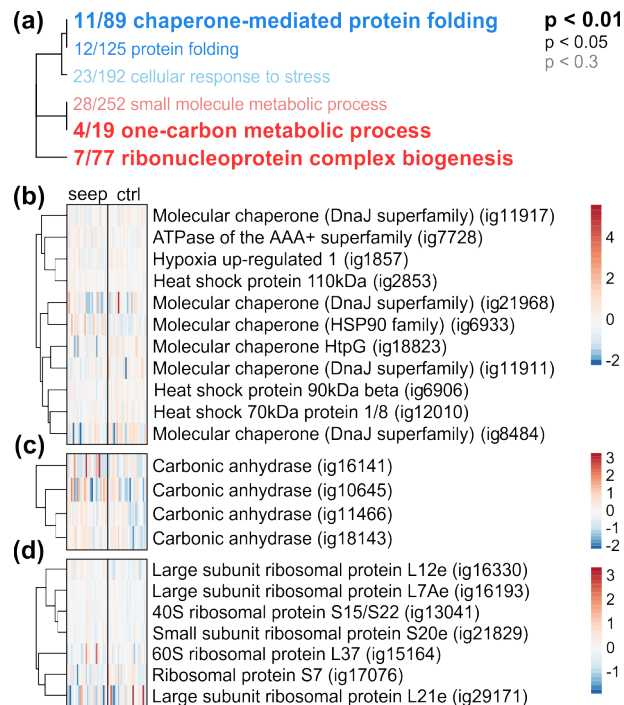

314  
 315 Figure 3. Hierarchical clustering of enriched gene ontology terms  
 316 ('biological process') among upregulated (red) and downregulated  
 317 (blue) genes in the coral host with respect to CO<sub>2</sub>-seep (a). Font  
 318 indicates level of statistical significance (FDR-corrected). Term names  
 319 are preceded by fraction indicating number of individual genes within  
 320 each term differentially regulated with respect to seep site (unadjusted  
 321  $P < 0.05$ ). Heatmaps of these 'good gene' fractions are shown for  
 322 'chaperone-mediated protein folding' (b), 'one-carbon metabolic  
 323 process' (c) and 'ribonucleoprotein complex biogenesis' (d).

324           Given the low number of candidate genes that passed the FDR threshold, a rank-based  
325 methodology was also used to determine functional enrichments among generally  
326 upregulated (red) and downregulated (blue) ontologies in corals from CO<sub>2</sub>-seep environments  
327 (Fig. 3a). ‘Chaperone-mediated protein folding’ (GO:0061077) was the top enrichment  
328 among genes downregulated in CO<sub>2</sub>-seep sites (Fig 3a, b). ‘Ribonucleoprotein complex  
329 biogenesis’ and ‘one-carbon metabolic process’ were the top two most enriched functional  
330 ontologies among genes upregulated in seep sites (GO:0022613 and GO:0006730,  
331 respectively, Fig. 3a, c, d). Interestingly, the most significantly differentially regulated genes  
332 within ‘one-carbon metabolic process’ are all individually annotated as carbonic anhydrases  
333 (Fig 3c).

334

### 335 ***Differential expression of Symbiodinium genes by CO<sub>2</sub> seep environment***

336           Of the 201 genes differentially expressed in response to CO<sub>2</sub>-seep environment, 128  
337 exhibited similar baseline expression levels between symbionts in corals from the different  
338 reef locations (Fig. 1b, ‘CO<sub>2</sub> seep’, Table S5). Of these, 96 were upregulated and 32 were  
339 downregulated in CO<sub>2</sub>-seep environments. Only 40% of these genes were annotated, and we  
340 again report expression patterns among these candidates only, although the data for all  
341 differentially expressed genes can be found in Table S5. To enhance the sparse knowledge on  
342 *Symbiodinium* responses to acidification, we report altered functional processes identified  
343 through categorical and rank-based enrichment analyses.

344

### 345 ***Categorical Functional Enrichments***

346           The relatively small number of genes responding to seep site and a lack of annotations  
347 resulted in no statistically significant ontology terms following FDR-correction of a  
348 categorical enrichment analysis. The top three ‘biological process’ enrichments were  
349 ‘regulation of chromosome organization’ (GO:0033044, P<sub>Raw</sub> = 0.005), ‘response to  
350 bacterium’ (GO:0009617, P<sub>Raw</sub> = 0.03) and ‘regulation of organelle organization’  
351 (GO:0033043, P<sub>Raw</sub>=0.05), which resulted from a set of six candidate genes. A peptidyl-  
352 prolyl cis-trans isomerase in the Ess family, matching Ess1 (c78122, GO:0033044,  
353 GO:0033043 Fig. 4a) is upregulated by 1.05-fold at seep sites. In the *Symbiodinium* Clade C  
354 transcriptome 62 clusters are annotated as PPIs, which catalyze the *cis–trans* isomerisation of  
355 peptide bonds N-terminal to proline residues in polypeptide chains, but this is the only cluster  
356 to have homology with Ess1. An E3 SUMO-protein ligase pli1 (c28523, GO:0033044,  
357 GO:0033043, Fig 4c) was also upregulated in seep site corals by 1.1-fold, but shows an

358 additional effect of reef origin, with *Symbiodinium* in Dobu corals having higher baseline  
 359 expression than *Symbiodinium* in Upa-Upasina corals. This annotation occurred twice in the  
 360 transcriptome, but the other gene (c71663) was not included in the final expression set. The  
 361 third gene in this regulatory group, the meiosis protein mei2 (c26263, GO:0033043, Fig 4a)  
 362 was also upregulated by 1.1-fold at seep sites. Three other clusters in the transcriptome were  
 363 assigned this annotation (c\_sym\_78605, c49233\_81271, c94595), two of which were in the  
 364 final expression set analyzed here and one was significantly differentially expressed with  
 365 respect to reef origin (c94595, 1.02-fold, Table S3).

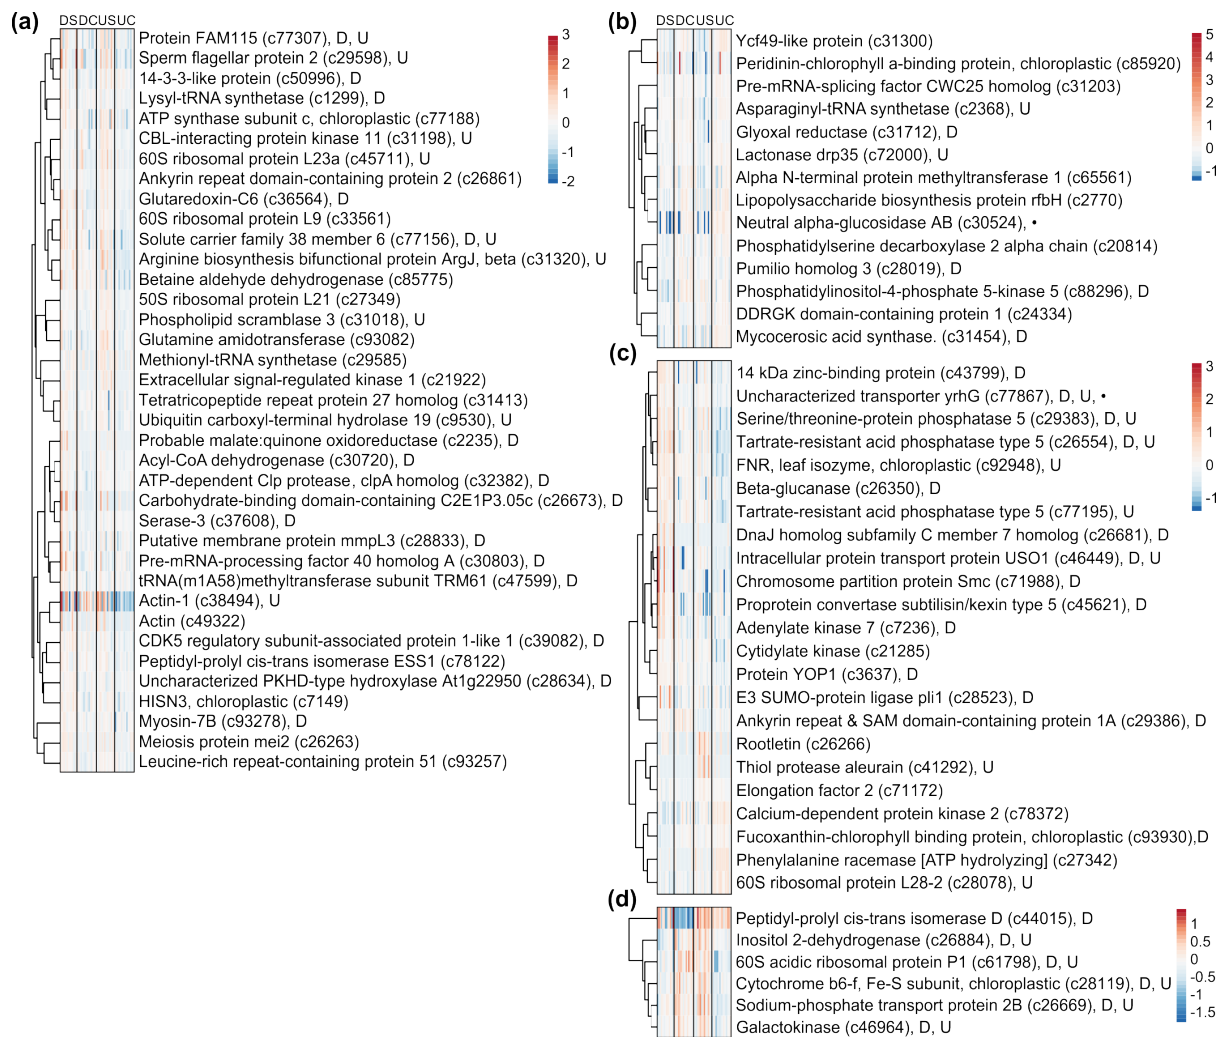

366  
 367 Figure 4. Heatmap of annotated genes (FDR-adjusted  $P < 0.1$ ) in *Symbiodinium* that showed  
 368 upregulation in response to seep environment (a), downregulation in response to seep  
 369 environment (b), an effect of reef origin in addition to an effect of seep environment (c) or a  
 370 reef origin x seep environment interaction (d). D=adjusted  $P < 0.1$  in Dobu-only dataset;  
 371 U=adjusted  $P < 0.1$  in Upa-Upasina-only dataset; •=Top discriminatory gene as identified via  
 372 between-groups analysis for seep environment. DS=Dobu-seep, DC=Dobu-control, US=Upa-  
 373 Upasina-seep, UC=Upa-Upasina-control.

374 The last three genes were all involved in bacterial response (GO:0009617) and all  
 375 upregulated in seep sites. One of the genes was a 14-3-3-like protein (c50996, 1.06-fold, 9  
 376 genes with this annotation in transcriptome, Fig. 4a). The second was an ankyrin repeat  
 377 domain-containing protein 2 (c26861, 1.02-fold, 9 genes with this annotation, Fig. 4a). The  
 378 last was tartrate resistant acid phosphatase type 5 (c26554, 1.1-fold, Fig 4c, 11 genes with  
 379 this annotation) and also showed an effect of origin, with *Symbiodinium* in Dobu corals  
 380 having higher baseline expression than *Symbiodinium* in Upa-Upasina corals.

381

382 *Rank-based Functional Enrichments*

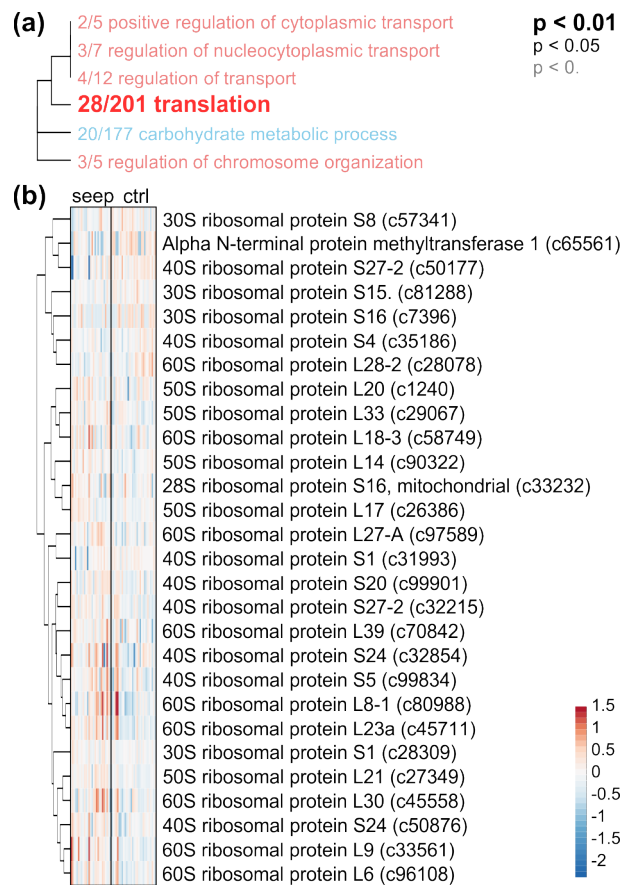

383

384 Figure 5. Hierarchical clustering of enriched gene ontology terms  
 385 ('biological process') among upregulated (red) and downregulated  
 386 (blue) symbiont genes with respect to CO<sub>2</sub>-seep (a). Font indicates  
 387 level of statistical significance (FDR-corrected). Term names are  
 388 preceded by fraction indicating number of individual genes within  
 389 each term differentially regulated with respect to seep site (unadjusted  
 390 P<0.05). A heatmap of this 'good gene' fraction is shown for  
 391 'translation' (b).

392 The only significant functional enrichment identified with rank-based analysis was  
393 ‘translation’ (GO:0006412, Fig. 5a) which was enriched among genes upregulated in seep  
394 sites. Individual genes within this term were primarily annotated as ribosomal proteins (Fig.  
395 5b).

396

397

## 398 **DISCUSSION**

399 The aim of this study was to investigate the genomic basis of acclimatization to  
400 chronic exposure to ocean acidification in a reef-building coral through a comparison of  
401 closely situated control and CO<sub>2</sub> impacted sites (500 m and 2500 m at Upa-Upasina and  
402 Dobu, respectively, with 30 km between the two populations). Uniquely, we report global  
403 gene expression profiles in both the coral host and their *in hospite Symbiodinium* that have  
404 undergone life-long acclimatization to naturally acidified environments. Previous population  
405 level studies (Fabricius *et al.*, 2014, Morrow *et al.*, 2015, Strahl *et al.*, 2015) strongly suggest  
406 that acidified environments impact the fitness of *Acropora millepora*. Despite this, we found  
407 very few consistent changes in global gene expression patterns between control and seep sites  
408 (Fig. 1). This may be because gene expression changes did not reflect actual protein content  
409 or because of post-translational regulation (Greenbaum *et al.*, 2003). It is also possible that  
410 substantial inter-individual variation in expression (e.g. Bay *et al.*, 2009, Csaszar *et al.*, 2009)  
411 masked the detectability of expression differences in response to environmental pCO<sub>2</sub>. On the  
412 other hand, important biochemical health measures related to cell protection and cell damage  
413 were unaffected in *A. millepora* in response to elevated pCO<sub>2</sub> up to 800 µatm at the same  
414 sites studied here (Strahl *et al.* 2015), consistent with our findings of a minimal expression  
415 response.

416 The absence of significant gene expression changes may not necessarily be surprising  
417 if acidification is a chronic stressor for the corals. Cellular stress gene expression responses  
418 are transient and non-specific (Kültz, 2005). Once immediate damage is repaired, a  
419 secondary, permanent cellular homeostasis response occurs, which is specific to the  
420 triggering stressor and which facilitates the maintenance of homeostasis under the new  
421 environmental regime (Kültz, 2003). It is likely that *A. millepora* exhibits open populations in  
422 this system given the broadcast spawning behavior of this species and the close proximity of  
423 study sites. Newly recruited juvenile corals may have exhibited an initial stress response, but  
424 their gene expression baselines shifted with age in order to acclimate to their local  
425 environment. Moya *et al.* (2015) previously reported dampened expression responses in a

426 time-series exposure of juvenile *A. millepora* to elevated pCO<sub>2</sub>, consistent with this  
427 hypothesis. Therefore, the small but constitutive differences in expression detected here, in  
428 two replicate populations (n = 13 - 15 colonies per site) acclimatized to CO<sub>2</sub>-seep  
429 environments, likely reflects the core expression homeostasis response to ocean acidification.

430 In the coral host, this core response involves changes in gene regulation involved in  
431 fatty acid (FA) metabolism (Fig. 2). Differential regulation of stress response genes also  
432 occurred: specifically, corals from seep environments constitutively down-regulate  
433 expression of molecular chaperones (Fig 3a, b). Interestingly, we did not find explicit  
434 signatures indicating altered expression in calcification related genes, though some carbonic  
435 anhydrase isoforms did appear to be constitutively upregulated in seep environments (Fig 3c),  
436 but those could also be involved in cellular pH homeostasis. Finally, expression changes in *in*  
437 *hospite Symbiodinium* were greater, and unlike patterns in their coral hosts, were not  
438 consistent in seep habitats among reefs (Fig. 1c, d), which may have implications for the  
439 symbiosis.

440

#### 441 *Differential regulation of fatty acid metabolism*

442 The combined upregulation of a FA synthesis gene (Stearoyl-CoA desaturase) and  
443 downregulation of a FA catabolism gene (Long-chain-fatty-acid-CoA ligase), both key  
444 enzymes in their respective functional pathways (Dobrzyn *et al.*, 2004, Watkins, 1997) and  
445 fairly unique annotations within the *A. millepora* transcriptome, suggest that coral lipid  
446 metabolism is modified in the process of acclimatization to acidification. Recent work on the  
447 transcriptomic response of urchins (*Strongylocentrotus purpuratus*) to experimental ocean  
448 acidification found that populations which naturally experience more frequent low pH  
449 conditions also differentially regulated fatty acid metabolic pathways (Evans *et al.*, 2017).  
450 Interestingly, differential regulation of lipid metabolism genes was also observed in prior  
451 laboratory experiments on corals exposed to acute acidification stress (Moya *et al.*, 2012b),  
452 but this particular functional process was not specifically discussed. Eleven clusters encoding  
453 fatty acid synthases were found in the *A. millepora* transcriptome, and most of them were  
454 upregulated in response to acute acidification stress (A. Moya unpublished data).

455 Our results indicate a metabolic shift in CO<sub>2</sub>-seep site corals in favor of increasing  
456 lipid storage. This is supported by findings of Strahl *et al.* (2015), who detected slightly  
457 higher ratios of storage to structural lipids in *A. millepora* at seep vs. control sites at Dobu  
458 and Upa-Upasina. Stearoyl-CoA desaturase catalyzes the rate-limiting step in the synthesis of  
459 unsaturated fatty acids, which are components of both structural (e.g. membrane



460 phospholipids) and storage lipids (e.g. triacylglycerol, wax esters, sterol ester), and the  
461 disruption of genes encoding this enzyme in mice leads to reduced body adiposity (Ntambi *et*  
462 *al.*, 2002). Long-chain-fatty-acid-CoA ligase, on the other hand, activates the first step of  
463 fatty acid metabolism or  $\beta$ -oxidation (Watkins, 1997), when lipids are being broken down.  
464 Storage lipids such as wax esters, triacylglycerol and free fatty acids are critical components  
465 of corals' energetic status (Edmunds & Davies, 1986, Harland *et al.*, 1993) and depletions in  
466 lipid stores can impact long-term survival and reproduction (Anthony *et al.*, 2009).  
467 Furthermore, genes involved in lipid metabolism were found to exhibit significantly elevated  
468 rates of protein evolution in Acroporids, but the authors were unable to speculate about  
469 putative adaptive roles for lipid metabolism (Voolstra *et al.*, 2011).

470       Recently, Strahl *et al.* (2016) found that *A. millepora* from the Dobu seep site tend to  
471 have elevated levels of total lipid and protein, as well as elevated levels of FAs (including  
472 polyunsaturated FA) relative to control site corals, in support of observed expression  
473 differences. Other studies have also found significant changes in lipid content in response to  
474 acidification. In two separate aquarium-based acidification experiments, lipid content in *A.*  
475 *millepora* was found to increase following exposure to elevated pCO<sub>2</sub> (Kaniewska *et al.*,  
476 2015, Schoepf *et al.*, 2013). Behavioral changes may also be involved in this pattern as both  
477 feeding rate and lipid storage increased in *Acropora cervicornis* under simulated acidification  
478 (Towle *et al.*, 2015). Whether the mechanism is behavioral plasticity or adaptive genetic  
479 change in lipid metabolic capacity, the combined evidence suggests that lipid metabolism  
480 likely plays a role in a coral's capacity to withstand ocean acidification and future work  
481 should aim to investigate the mechanistic basis of this process.

482

#### 483 *Downregulation of chaperones*

484       Upregulation of chaperones is a hallmark of the acute cellular stress response (Gasch  
485 *et al.*, 2000), but is usually transient as constitutive upregulation of heat shock proteins is  
486 costly and can result in decreased growth and fecundity (Sørensen *et al.*, 2003). In  
487 *Drosophila* and soil isopods exposed to chronic stress, Hsp70 expression is reduced rather  
488 than elevated (Köhler & Eckwert, 1997, Sørensen *et al.*, 1999). HSPs are also known to be  
489 constitutively downregulated following long-term thermal stress in corals (Kenkel *et al.*,  
490 2013b, Meyer *et al.*, 2011, Sharp *et al.*, 1997). Short-term laboratory manipulations suggest  
491 that exposure to acidification prompts expression of immediate stress response genes, like  
492 HSPs (Moya *et al.*, 2012b, Moya *et al.*, 2015); and Kaniewska *et al* (2012) observed  
493 downregulation of chaperones following one month of elevated pCO<sub>2</sub> exposure. Therefore,

494 acute exposure to acidification conditions is stressful for *A. millepora* and the constitutive  
495 downregulation of HSPs observed here is likely a consequence of chronic exposure to  
496 elevated pCO<sub>2</sub> at the seep sites.

497         Given that HSP induction is critical for mounting a successful thermal stress response,  
498 the suppression of baseline HSP expression levels induced by acidified environments may  
499 impact the capacity of *A. millepora* to cope with the synergistic effects of global climate  
500 change. Acidification is predicted to become a chronic stress on reefs worldwide if climates  
501 continue to change (Hoegh-Guldberg *et al.*, 2007). While temperatures will simultaneously  
502 increase, extreme thermal anomalies are also predicted to become more frequent and severe  
503 (Frich *et al.*, 2002). Our results suggest that the combined effects of acidification and  
504 temperature stress may be more detrimental than acidification alone because of the  
505 dampening effects of chronic exposure on the cellular stress response. Some laboratory  
506 manipulations have found synergistic negative impacts of combined acidification and  
507 temperature; for example, calcification of *Stylophora pistillata* decreased by 50% under both  
508 elevated temperature and pCO<sub>2</sub>, but was unchanged under each stressor individually  
509 (Reynaud *et al.*, 2003). However, bleaching surveys following a minor thermal stress event in  
510 PNG did not indicate that acidified reefs suffered increased bleaching relative to control reefs  
511 (Noonan & Fabricius, 2015). It will be critical to determine whether constitutive  
512 downregulation of HSPs resulting from long-term pCO<sub>2</sub> exposure makes it more difficult for  
513 a coral to subsequently upregulate HSPs to counter acute thermal stress, or if other  
514 mechanisms or isoforms are employed to counter acute thermal stress in chronically acidified  
515 environments.

516

#### 517 *No significant differential regulation of calcification genes*

518         We did not observe functional enrichments indicating differential regulation of  
519 calcification related genes overall in *A. millepora*, although some carbonic anhydrase  
520 isoforms were constitutively upregulated in seep site corals (Fig. 3c). Experimentally, some  
521 coral species have been shown to maintain (Reynaud *et al.*, 2003) and even increase (Castillo  
522 *et al.*, 2014) calcification during laboratory acidification experiments and this effect has been  
523 hypothesized to result from the ability of corals to alter carbonate chemistry at the site of  
524 calcification (McCulloch *et al.*, 2012, Venn *et al.*, 2013). Our *a priori* expectation was that  
525 expression patterns of calcification related genes should be altered to affect this physiological  
526 rescue. *Pocillopora damicornis* were observed to upregulate HCO<sub>3</sub><sup>-</sup> transporters at  
527 moderately low pH (7.8 and 7.4; Vidal-Dupiol *et al.*, 2013), while *Siderastrea siderea*

528 upregulated expression of H<sup>+</sup> ion transporters (Davies *et al.*, 2016) consistent with this  
529 hypothesis.

530         However, *A. millepora* does not appear to conform to this expectation. Expression of  
531 calcification related genes significantly changed in *A. millepora* following short-term 3-day  
532 acidification stress exposure (Moya *et al.*, 2012b), but these effects dissipate when  
533 experimental treatment periods are extended (Kaniewska *et al.*, 2012, Moya *et al.*, 2015,  
534 Rocker *et al.*, 2015; 28, 9 and 14 days, respectively). Furthermore, *A. millepora* from PNG  
535 seep sites had reduced levels of net calcification, resulting from decreases in dark  
536 calcification, compared to neighboring control reef sites (Strahl *et al.*, 2015). This suggests  
537 that *A. millepora* has a reduced capacity to actively alter pH at the site of calcification in the  
538 absence of additional photosynthetic energy (i.e. in the dark, Strahl *et al.*, 2015). The  
539 regulation of cellular pH at calcification sites is an energetically costly process (Al-Horani,  
540 2005, Barnes & Chalker, 1988). Given that calcification related gene expression is plastic in  
541 *A. millepora* on shorter time-scales (Moya *et al.*, 2012a), it is possible that the lack of  
542 constitutive differential regulation under long-term acidification, and subsequent decrease in  
543 net calcification, were not necessarily due to a lack of genetic variation in the ability to  
544 actively regulate these genes, but a result of trade-offs in allocation of finite energetic  
545 resources to other less costly processes that maximize net fitness under acidification stress.  
546 Indeed, Strahl *et al.* (2016) hypothesized that *A. millepora* may invest in increased tissue  
547 biomass rather than skeletal growth under acidified conditions based on prior experimental  
548 observations of unchanged or increased biomass in combination with reduced calcification  
549 (Krief *et al.*, 2010, Schoepf *et al.*, 2013, Strahl *et al.*, 2015).

550

#### 551 *Inconsistent changes in Symbiodinium expression profiles*

552         More significant differences in gene expression were detected for *Symbiodinium* than  
553 for host corals between control and elevated pCO<sub>2</sub> sites examined here. This corroborates  
554 findings from *Pocillopora damicornis* where their *in hospite* clade C *Symbiodinium*,  
555 symbionts demonstrated a more pronounced expression response following a 2-week  
556 exposure to elevated temperature, although this difference was no longer evident after 36-  
557 weeks (Mayfield *et al.*, 2014). Kaniewska *et al.* (2015) examined metatranscriptomic  
558 expression responses of coral holobionts to future climate change scenarios, but their analysis  
559 method did not explicitly compare host and symbiont. Kenkel and Matz (2016) reported  
560 expression of both host and symbionts in *P. astreoides* corals reciprocally transplanted  
561 between reef habitats, but again, their network-based analytical approach precludes a direct

562 comparison with results uncovered here. A reanalysis of their dataset with the method used  
563 here found that 14.8% of the host transcriptome was significantly differentially expressed  
564 with respect to transplant environment, while only 1.4% of the symbiont transcriptome was  
565 altered (Kenkel, unpublished data). Given the paucity of studies examining global expression  
566 of both partners in response to environmental stress (to our knowledge, the present study is  
567 only to examine expression under elevated pCO<sub>2</sub>), it is difficult to draw any conclusions  
568 regarding the present patterns. More data are needed to determine whether there are any  
569 consistent patterns in *Symbiodinium* gene expression responses relative to those of their host  
570 corals.

571 Expression changes of *in hospite Symbiodinium* showed greater differences between  
572 control and seep sites across reefs compared to the coral host (Fig. 1c vs. d). The dominant  
573 *Symbiodinium* types did not differ among corals at control and seep sites (Table S1, Fig. S1,  
574 Noonan *et al.*, 2013) but it is possible that undetected background *Symbiodinium* clades or  
575 types impacted expression levels if reads from other types failed to map to the Clade C  
576 reference transcriptome used here (Ladner *et al.*, 2012). However, if differences in rare  
577 *Symbiodinium* types or their expression patterns were consistent among reefs, we would still  
578 expect to observe consistent changes in expression with respect to seep environment.  
579 Conversely, if there was an interaction between potential differences in background clades or  
580 types and seep environment, this could explain the variation observed (Fig. 1d). Control site  
581 expression profiles are remarkably similar between reef sites, and the major axis of variation  
582 differentiated seep from control site populations. However, the second principal component  
583 describes variation in expression that is largely the result of divergence between seep site  
584 expression of Dobu and Upa-Upasina origin corals (Fig. 1d).

585 Consistent expression changes among control and seep site *Symbiodinium* implicated  
586 an alteration of the biological process of translation: specifically, many ribosomal proteins  
587 were constitutively upregulated at the seep sites (Fig. 5). Ribosome production is intimately  
588 tied to cell growth, and known to regulate cell size and the cell cycle (Jorgensen & Tyers,  
589 2004). Net photosynthesis was significantly elevated in *A. millepora* from CO<sub>2</sub>-seep sites  
590 (Strahl *et al.*, 2015), potentially as a result of enhanced *Symbiodinium* cell growth or division  
591 (and hence elevated expression of ribosomal proteins) although these processes remain to be  
592 quantified. Determining the mechanistic drivers of divergence between seep site populations  
593 among Dobu and Upa-Upasina reefs is more difficult. Of the top 10 gene loadings for PC2  
594 (Fig. 1d), 8 had no annotation, precluding speculation about function. Nevertheless, the  
595 complexity of the response in *Symbiodinium* may have implications for the symbiotic

596 interaction, if the coral host has to respond to the dual impacts of changes in its external  
597 environment, and its symbiont community. It is recognized that mutualisms are more  
598 susceptible to climate change impacts because the inherent inter-dependency between species  
599 means that even though stress only impacts one partner, both partners ultimately share the  
600 cost (Kiers *et al.*, 2010). There are many knowledge gaps remaining for both major global  
601 change stressors, however, our understanding of thermal stress impacts on the coral-algal  
602 symbiosis far outstrips understanding of acidification impacts (Barshis, 2015). Filling this  
603 gap will be critical for refining predictions of coral response to continued acidification and  
604 the combined impacts of global climate change.

605

#### 606 DATA ARCHIVING

607

608 Raw RNA Tag-seq data have been uploaded to NCBI's SRA: PRJNA362652. R scripts and  
609 input files for gene expression analyses will be archived on DRYAD upon manuscript  
610 acceptance. R scripts for ontology enrichment analyses and directions for formatting input  
611 files can be found at [http://www.bio.utexas.edu/research/matz\\_lab/matzlab/Methods.html](http://www.bio.utexas.edu/research/matz_lab/matzlab/Methods.html)

612

#### 613 ACKNOWLEDGEMENTS

614

615 We thank the communities at Dobu and Upa-Upasina for their permission to study the corals  
616 on their reef. Many thanks to Katharina Fabricius, Sam Noonan, Sven Uthicke and the crew  
617 of the M.V. Chertan for their support during field work. We thank P. Davern and M.  
618 Donaldson for their help with the logistics and shipment of the equipment, and QantasLink  
619 for continued support. Catarina Schlott crushed samples for RNA extractions. Bioinformatic  
620 analyses were carried out using the computational resources of the Texas Advanced  
621 Computing Center (TACC). This project was funded by the Australian Government's  
622 National Environmental Research Program and the Australian Institute of Marine Science.

623

624

625

626

627

628

629

630

631

632

633 REFERENCES

634

635

636 Al-Horani F (2005) Effects of changing seawater temperature on photosynthesis and  
637 calcification in the scleractinian coral *Galaxea fascicularis*, measured with O<sub>2</sub>,  
638 Ca<sup>2+</sup> and pH microsensors. *Scientia Marina*, **69**, 347-354.

639 Albright R (2011) Reviewing the effects of ocean acidification on sexual reproduction  
640 and early life history stages of reef-building corals. *Journal of Marine Biology*,  
641 **2011**, 1-14.

642 Anders S, Huber W (2010) Differential expression analysis for sequence count data.  
643 *Genome Biology*, **11**, R106.

644 Anthony KRN, Hoogenboom MO, Maynard JA, Grottoli AG, Middlebrook R (2009)  
645 Energetics approach to predicting mortality risk from environmental stress: a  
646 case study of coral bleaching. *Functional Ecology*, **23**, 539-550.

647 Barnes D, Chalker B (1988) Calcification and photosynthesis in reef-building corals and  
648 algae. In: *Ecosystems of the World, 25. Coral Reefs*. (ed Dubinsky Z) pp Page.  
649 Amsterdam, The Netherlands, Elsevier Science Publishing Company, Inc.

650 Barshis D, Ladner JT, Oliver TA, Seneca FO, Traylor-Knowles N, Palumbi SR (2013)  
651 Genomic basis for coral resilience to climate change. *Proceedings of the National*  
652 *Academy of Sciences of the United States of America*, **110**, 1387-1392.

653 Barshis DJ (2015) Genomic potential for coral survival of climate change. In: *Coral Reefs*  
654 *in the Anthropocene*. (ed Birkeland C) pp Page. Dordrecht, Springer  
655 Science+Business Media.

656 Bay LK, Nielsen HB, Jarmer H, Seneca F, Van Oppen MJH (2009) Transcriptomic  
657 variation in a coral reveals pathways of clonal organisation. *Marine Genomics*, **2**,  
658 119-125.

659 Benjamini Y, Hochberg Y (1995) Controlling the false discovery rate - a practical and  
660 powerful approach to multiple testing. *Journal of the Royal Statistical Society*  
661 *Series B-Methodological*, **57**, 289-300.

662 Caley MJ, St John J (1996) Refuge availability structures assemblages of tropical reef  
663 fishes. *Journal of Animal Ecology*, **65**, 414-428.

664 Castillo KD, Ries JB, Bruno JF, Westfield IT (2014) The reef-building coral *Siderastrea*  
665 *siderea* exhibits parabolic responses to ocean acidification and warming.  
666 *Proceedings of the Royal Society B: Biological Sciences*, **281**, 20141856.

667 Chan NCS, Connolly SR (2013) Sensitivity of coral calcification to ocean acidification: a  
668 meta-analysis. *Global Change Biology*, **19**, 282-290.

669 Cooper SK, Pandhare J, Donald SP, Phang JM (2008) A novel function for hydroxyproline  
670 oxidase in apoptosis through generation of reactive oxygen species. *Journal of*  
671 *Biological Chemistry*, **283**, 10485-10492.

672 Csaszar NBM, Seneca FO, Van Oppen MJH (2009) Variation in antioxidant gene  
673 expression in the scleractinian coral *Acropora millepora* under laboratory  
674 thermal stress. *Marine Ecology Progress Series*, **392**.

675 Culhane AC, Thioulouse J, Perriere G, Higgins DG (2005) MADE4: an R package for  
676 multivariate analysis of gene expression data. *Bioinformatics*, **21**, 2789-2790.

677 D'croz L, Maté JL (2004) Experimental responses to elevated water temperature in  
678 genotypes of the reef coral *Pocillopora damicornis* from upwelling and non-  
679 upwelling environments in Panama. *Coral Reefs*, **23**, 473-483.

- 680 Davies SW, Marchetti A, Ries JB, Castillo KD (2016) Thermal and pCO<sub>2</sub> stress elicit  
681 divergent transcriptomic responses in a resilient coral. *Frontiers in Marine*  
682 *Science*, **3**.
- 683 Debiasse MB, Kelly MW (2016) Plastic and evolved responses to global change: what  
684 can we learn from comparative transcriptomics? *Journal of Heredity*, **107**, 71-81.
- 685 Dixon GB, Davies SW, Aglyamova GV, Meyer E, Bay LK, Matz MV (2015) Genomic  
686 determinants of coral heat tolerance across latitudes. *Science*, **348**, 1460-1462.
- 687 Dobrzyn P, Dobrzyn A, Miyazaki M *et al.* (2004) Stearoyl-CoA desaturase 1 deficiency  
688 increases fatty acid oxidation by activating AMP-activated protein kinase in liver.  
689 *Proceedings of the National Academy of Sciences of the United States of America*,  
690 **101**, 6409-6414.
- 691 Edmunds PJ, Davies PS (1986) An energy budget for *Porites porites* (Scleractinia).  
692 *Marine Biology*, **92**, 339-347.
- 693 Erez J, Reynaud S, Silverman J, Schneider K, Allemand D (2011) Coral calcification under  
694 ocean acidification and global change. In: *Coral Reefs: An Ecosystem in Transition*.  
695 (eds Dubinsky Z, Stambler N) pp Page. New York, Springer.
- 696 Evans TG, Pespeni MH, Hofmann GE, Palumbi SR, Sanford E (2017) Transcriptomic  
697 responses to seawater acidification among sea urchin populations inhabiting a  
698 natural pH mosaic. *Molecular Ecology*.
- 699 Fabricius KE, De'ath G, Noonan SHC, Uthicke S (2014) Ecological effects of ocean  
700 acidification and habitat complexity on reef-associated macroinvertebrate  
701 communities. *Proceedings of the Royal Society B: Biological Sciences*, **281**,  
702 20132479.
- 703 Fabricius KE, Langdon C, Uthicke S *et al.* (2011) Losers and winners in coral reefs  
704 acclimatized to elevated carbon dioxide concentrations. *Nature Climate Change*,  
705 **1**, 165-169.
- 706 Feely RA, Doney SC, Cooley SR (2009) Ocean acidification: present conditions and future  
707 changes in a high-CO<sub>2</sub> world. *Oceanography*, **22**, 36-47.
- 708 Frich P, Alexander LV, Della-Marta P, Gleason B, Haylock M, Klein Tank AMG, Peterson T  
709 (2002) Observed coherent changes in climatic extremes during the second half of  
710 the twentieth century. *Climate Research*, **19**, 193-212.
- 711 Gasch AP, Spellman PT, Kao CM *et al.* (2000) Genomic expression programs in the  
712 response of yeast cells to environmental changes. *Molecular Biology of the Cell*,  
713 **11**, 4241-4257.
- 714 Gentleman R, Carey V, Huber W, Hahne F (2016) genefilter: methods for filtering genes  
715 from high-throughput experiments. pp Page.
- 716 Greenbaum D, Colangelo C, Williams K, Gerstein M (2003) Comparing protein  
717 abundance and mRNA expression levels on a genomic scale. *Genome Biology*, **4**.
- 718 Harland AD, Navarro JC, Davies PS, Fixter LM (1993) Lipids of some Caribbean and Red  
719 Sea corals: total lipid, wax esters, triglycerides and fatty acids. *Marine Biology*,  
720 **117**, 113-117.
- 721 Hoegh-Guldberg O, Mumby PJ, Hooten AJ *et al.* (2007) Coral reefs under rapid climate  
722 change and ocean acidification. *Science*, **318**, 1737-1742.
- 723 Idjada JA, Edmunds PJ (2006) Scleractinian corals as facilitators of other invertebrates  
724 on a Caribbean reef. *Marine Ecology Progress Series*, **319**, 117-127.
- 725 Jokiel PL (2011) Ocean acidification and control of reef coral calcification by boundary  
726 layer limitation of proton flux. *Bulletin of Marine Science*, **87**, 639-657.
- 727 Jorgensen P, Tyers M (2004) How cells coordinate growth and division. *Current Biology*,  
728 **14**, R1014-R1027.

- 729 Kaniewska P, Campbell PR, Kline DI, Mauricio R-L, Miller DJ, Dove S, Hoegh-Guldberg O  
730 (2012) Major cellular and physiological impacts of ocean acidification on a reef  
731 building coral. PLoS ONE, **7**, e34659.
- 732 Kaniewska P, Chan C-KK, Kline D *et al.* (2015) Transcriptomic changes in coral  
733 holobionts provide insights into physiological challenges of future climate and  
734 ocean change. PLoS ONE, **10**, e0139223.
- 735 Kauffmann A, Gentleman R, Huber W (2009) arrayQualityMetrics - a bioconductor  
736 package for quality assessment of microarray data. Bioinformatics, **25**, 415-416.
- 737 Kenkel C, Aglyamova G, Alamaru A *et al.* (2011) Development of gene expression  
738 markers of acute heat-light stress in reef-building corals of the genus *Porites*  
739 PLoS ONE, **6**, e26914.
- 740 Kenkel C, Goodbody-Gringley G, Caillaud D, Davies SW, Bartels E, Matz M (2013a)  
741 Evidence for a host role in thermotolerance divergence between populations of  
742 the mustard hill coral (*Porites astreoides*) from different reef environments.  
743 Molecular Ecology, **22**, 4335-4348.
- 744 Kenkel C, Meyer E, Matz M (2013b) Gene expression under chronic heat stress in  
745 populations of the mustard hill coral (*Porites astreoides*) from different thermal  
746 environments. Molecular Ecology, **22**, 4322-4334.
- 747 Kenkel CD, Matz MV (2016) Gene expression plasticity as a mechanism of coral  
748 adaptation to a variable environment. Nature Ecology & Evolution, **1**, 0014.
- 749 Kiers TE, Palmer TM, Ives AR, Bruno JF, Bronstein JL (2010) Mutualisms in a changing  
750 world: an evolutionary perspective. Ecology Letters, **13**, 1459-1474.
- 751 Kleypas JA, Buddemeier RW, Archer D, Gattuso JP, Langdon C, Opdyke BN (1999)  
752 Geochemical consequences of increased atmospheric carbon dioxide on coral  
753 reefs. Science, **284**, 118-120.
- 754 Köhler HR, Eckwert H (1997) The induction of stress proteins (hsp) in *Oniscus asellus*  
755 (*Isopoda*) as a molecular marker of multiple heavy metal exposure. 2. Joint  
756 toxicity and transfer to field situations. Ecotoxicology, **6**, 263-274.
- 757 Krief S, Hendy E, Fine M, Yamd R, Meibom A, Foster G, Shemesh A (2010) Physiological  
758 and isotopic responses of scleractinian corals to ocean acidification. Geochimica  
759 and Cosmochimica Acta, **74**, 4988-5001.
- 760 Kültz D (2003) Evolution of the cellular stress proteome: from monophyletic origin to  
761 ubiquitous function. Journal of Experimental Biology, **206**, 3119-3124.
- 762 Kültz D (2005) Molecular and evolutionary basis of the cellular stress response. Annual  
763 Review of Physiology, **67**, 225-257.
- 764 Ladner JT, Barshis DJ, Palumbi SR (2012) Protein evolution in two co-occurring types of  
765 Symbiodinium: an exploration into the genetic basis of thermal tolerance in  
766 Symbiodinium clade D. BMC Evolutionary Biology, **12**.
- 767 Langmead B, Salzberg S (2012) Fast gapped-read alignment with Bowtie 2. Nature  
768 Methods, **9**, 357-359.
- 769 Lohman BK, Weber JN, Bolnick DI (2016) Evaluation of TagSeq, a reliable low-cost  
770 alternative for RNAseq. Molecular Ecology Resources.
- 771 Mayfield AB, Wang Y-B, Chen C-S, Lin G-Y, Chen S-H (2014) Compartment-specific  
772 transcriptomics in a reef-building coral exposed to elevated temperatures.  
773 Molecular Ecology, **23**, 5816-5830.
- 774 McCulloch M, Falter J, Trotter J, Montagna P (2012) Coral resilience to ocean  
775 acidification and global warming through pH up-regulation. Nature Climate  
776 Change, **2**, 623-627.



- 777 Meyer E, Aglyamova GV, Matz MV (2011) Profiling gene expression responses of coral  
778 larvae (*Acropora millepora*) to elevated temperature and settlement inducers  
779 using a novel RNA-Seq procedure. *Molecular Ecology*, **20**, 3599-3616.
- 780 Morrow KM, Bourne D, Humphrey C *et al.* (2015) Natural volcanic CO<sub>2</sub> seeps reveal  
781 future trajectories for host-microbial associations in corals and sponges. *The*  
782 *ISME Journal*, **9**, 894-908.
- 783 Moya A, Ganot P, Furla P, Sabourault C (2012a) The transcriptomic response to thermal  
784 stress is immediate, transient and potentiated by ultraviolet radiation in the sea  
785 anemone *Anemonia viridis*. *Molecular Ecology*, **21**, 1158-1174.
- 786 Moya A, Huisman L, Ball EE *et al.* (2012b) Whole transcriptome analysis of the coral  
787 *Acropora millepora* reveals complex responses to CO<sub>2</sub>-driven acidification during  
788 the initiation of calcification. *Molecular Ecology*, **21**, 2440-2454.
- 789 Moya A, Huisman L, Foret S, Gattuso JP, Hayward DC, Ball EE, Miller DJ (2015) Rapid  
790 acclimation of juvenile corals to CO<sub>2</sub>-mediated acidification by upregulation of  
791 heat shock protein and Bcl-2 genes. *Molecular Ecology*, **24**, 438-452.
- 792 Neave MJ, Rachmawati R, Xun L, Michell CT, Bourne DG, Apprill A, Voolstra CR (2017)  
793 Differential specificity between closely related corals and abundant  
794 *Endozoicomonas* endosymbionts across global scales. *The ISME Journal*, **11**, 186-  
795 200.
- 796 Noonan SHC, Fabricius KE (2015) Ocean acidification affects productivity but not the  
797 severity of thermal bleaching in some tropical corals. *ICES Journal of Marine*  
798 *Science*.
- 799 Noonan SHC, Fabricius KE, Humphrey C (2013) Symbiodinium community composition  
800 in Scleractinian corals is not affected by life-long exposure to elevated carbon  
801 dioxide. *PLoS ONE*, **8**, e63985.
- 802 Ntambi JM, Miyazaki M, Stoehr JP *et al.* (2002) Loss of stearoyl-CoA desaturase-1  
803 function protects mice against adiposity. *Proceedings of the National Academy of*  
804 *Sciences of the United States of America*, **99**, 11482-11486.
- 805 Oliver TA, Palumbi SR (2011) Do fluctuating temperature environments elevate coral  
806 thermal tolerance? *Coral Reefs*, **30**, 429-440.
- 807 Palstra F (2000) Host-endosymbiont specificity in *Acropora* corals of the Indo-Pacific?  
808 James Cook University, Townsville, Australia.
- 809 Reynaud S, Leclercq N, Romaine-Lioud S, Ferrier-Pages C, Jaubert J, Gattuso JP (2003)  
810 Interacting effects of CO<sub>2</sub> partial pressure and temperature on photosynthesis  
811 and calcification in a scleractinian coral. *Global Change Biology*, **9**, 1660-1668.
- 812 Rocker MM, Noonan SHC, Humphrey C, Moya A, Willis BL, Bay LK (2015) Expression of  
813 calcification and metabolism-related genes in response to elevated pCO<sub>2</sub> and  
814 temperature in the reef-building coral *Acropora millepora*. *Marine Genomics*, **24**,  
815 313-318.
- 816 Sabine CL, Feely RA, Gruber N *et al.* (2004) The oceanic sink for anthropogenic CO<sub>2</sub>.  
817 *Science*, **305**, 367-371.
- 818 Schoepf V, Grottoli AG, Warner ME *et al.* (2013) Coral energy reserves and calcification  
819 in a high-CO<sub>2</sub> world at two temperatures. *PLoS ONE*, **8**, e75049.
- 820 Sharp V, Brown BE, Miller DJ (1997) Heat shock protein (hsp 70) expression in the  
821 tropical reef coral *Goniopora djiboutiensis*. *Journal of Thermal Biology*, **22**, 11-  
822 19.
- 823 Sheppard C, Dixon DJ, Gourlay M, Sheppard A, Payet R (2005) Coral mortality increases  
824 wave energy reaching shores protected by reef flats: Examples from the  
825 Seychelles. *Estuarine, Coastal and Shelf Science*, **64**, 223-234.

- 826 Sørensen JG, Kristensen TN, Loeschcke V (2003) The evolutionary and ecological role of  
827 heat shock proteins. *Ecology Letters*, **6**, 1025-1037.
- 828 Sørensen JG, Michalak P, Justesen J, Loeschcke V (1999) Expression of the heat-shock  
829 protein HSP70 in *Drosophila buzzatii* lines selected for thermal resistance.  
830 *Hereditas*, **131**, 155-164.
- 831 Strahl J, Francis DS, Doyle J, Humphrey C, Fabricius KE (2016) Biochemical responses to  
832 ocean acidification contrast between tropical corals with high and low  
833 abundances at volcanic carbon dioxide seeps. *ICES Journal of Marine Science*, **73**,  
834 897-909.
- 835 Strahl J, Stolz I, Uthicke S, Vogen N, Noonan SHC, Fabricius KE (2015) Physiological and  
836 ecological performance differs in four coral taxa at a volcanic carbon dioxide  
837 seep. *Comparative Biochemistry and Physiology Part A: Molecular & Integrative*  
838 *Physiology*, **184**, 179-186.
- 839 Team RC (2013) R: A language and environment for statistical computing. pp Page,  
840 Vienna, R Foundation for Statistical Computing.
- 841 Towle EK, Enochs IC, Langdon C (2015) Threatened Caribbean coral is able to mitigate  
842 the adverse effects of ocean acidification on calcification by increasing feeding  
843 rate. *PLoS ONE*, **10**, e0123394.
- 844 Van Oppen MJH, Palstra FP, Piquet AM, Miller DJ (2001) Patterns of coral-dinoflagellate  
845 associations in *Acropora*: significance of local availability and physiology of  
846 Symbiodinium strains and host-symbiont selectivity. *Proceedings of the Royal*  
847 *Society B-Biological Sciences*, **268**, 1759-1767.
- 848 Van Woesik R, Van Woesik K, Van Woesik L, Van Woesik S (2013) Effects of ocean  
849 acidification on the dissolution rates of reef-coral skeletons. *PeerJ*, **1**, e208.
- 850 Venn AA, Tambutté E, Holcomb M, Laurent J, Allemand D, Tambutté S (2013) Impact of  
851 seawater acidification on pH at the tissue-skeleton interface and calcification in  
852 reef corals. *Proceedings of the National Academy of Sciences of the United States*  
853 *of America*, **110**, 1634-1639.
- 854 Vidal-Dupiol J, Zoccola D, Tambutté E *et al.* (2013) Genes related to ion-transport and  
855 energy production are upregulated in response to CO<sub>2</sub>-driven pH decrease in  
856 corals: new insights from transcriptome analysis. *PLoS ONE*, **8**, e58652.
- 857 Voolstra CR, Sunagawa S, Matz M *et al.* (2011) Rapid evolution of coral proteins  
858 responsible for interaction with the environment. *PLoS ONE*, **6**, e20392.
- 859 Watkins PA (1997) Fatty Acid Activation. *Progress in Lipid Research*, **36**, 55-83.
- 860  
861  
862  
863  
864  
865  
866  
867  
868  
869  
870  
871  
872  
873  
874

875 SUPPLEMENTARY FIGURES

876

877 Figure S1. Electrophoresis gel showing digest of *Symbiodinium* Isu type for sampled corals.

878 All banding patterns match C1, save for sample ds9. C2 = *Symbiodinium* type C2 banding

879 pattern, C1= *Symbiodinium* type C1 banding pattern. ic=Upa-Upasina Control, is=Upa-

880 Upasina Seep, dc=Dobu Control, ds=Dobu Seep.

881

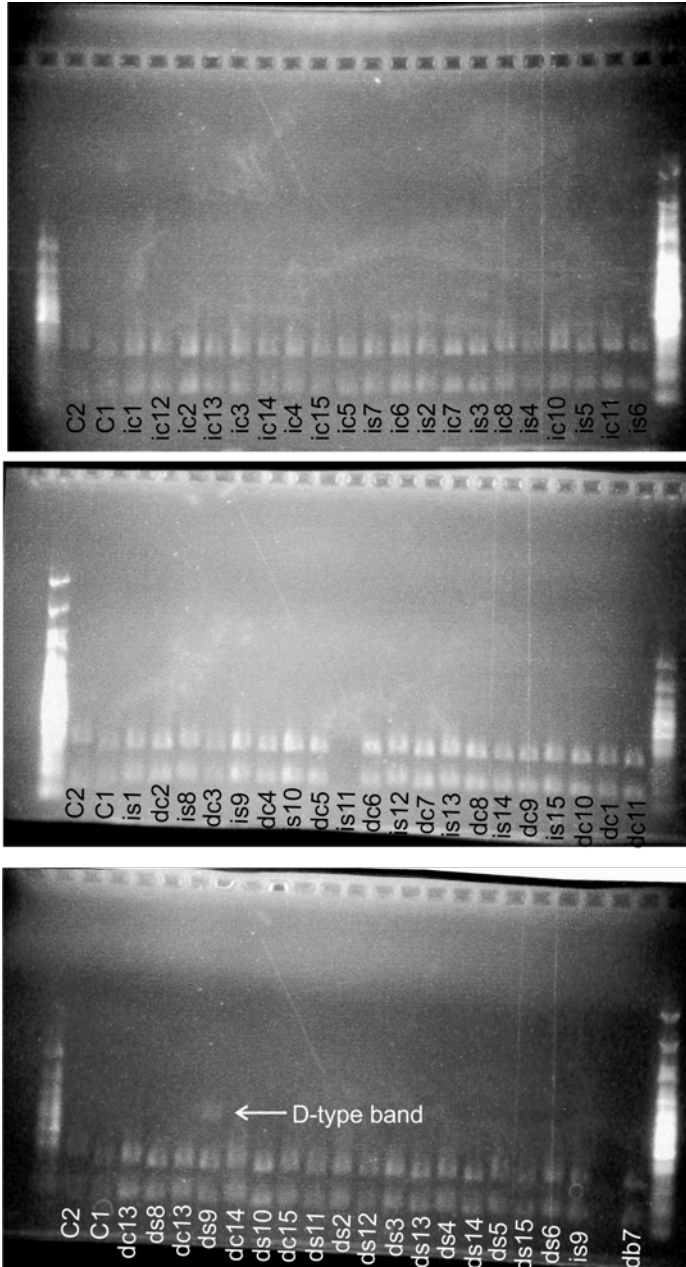

882

883

884

885

886

887

888

889

890 Figure S2. Hierarchical clustering of enriched gene ontology terms ('biological process')  
891 among differentially regulated genes by reef origin for the coral host (a) and symbiont (b).  
892 Red indicates terms among genes upregulated in Upa-Upasina-origin corals relative to Dobu  
893 corals and blue indicates terms among genes upregulated in Dobu corals relative to Upa-  
894 Upasina corals.  
895

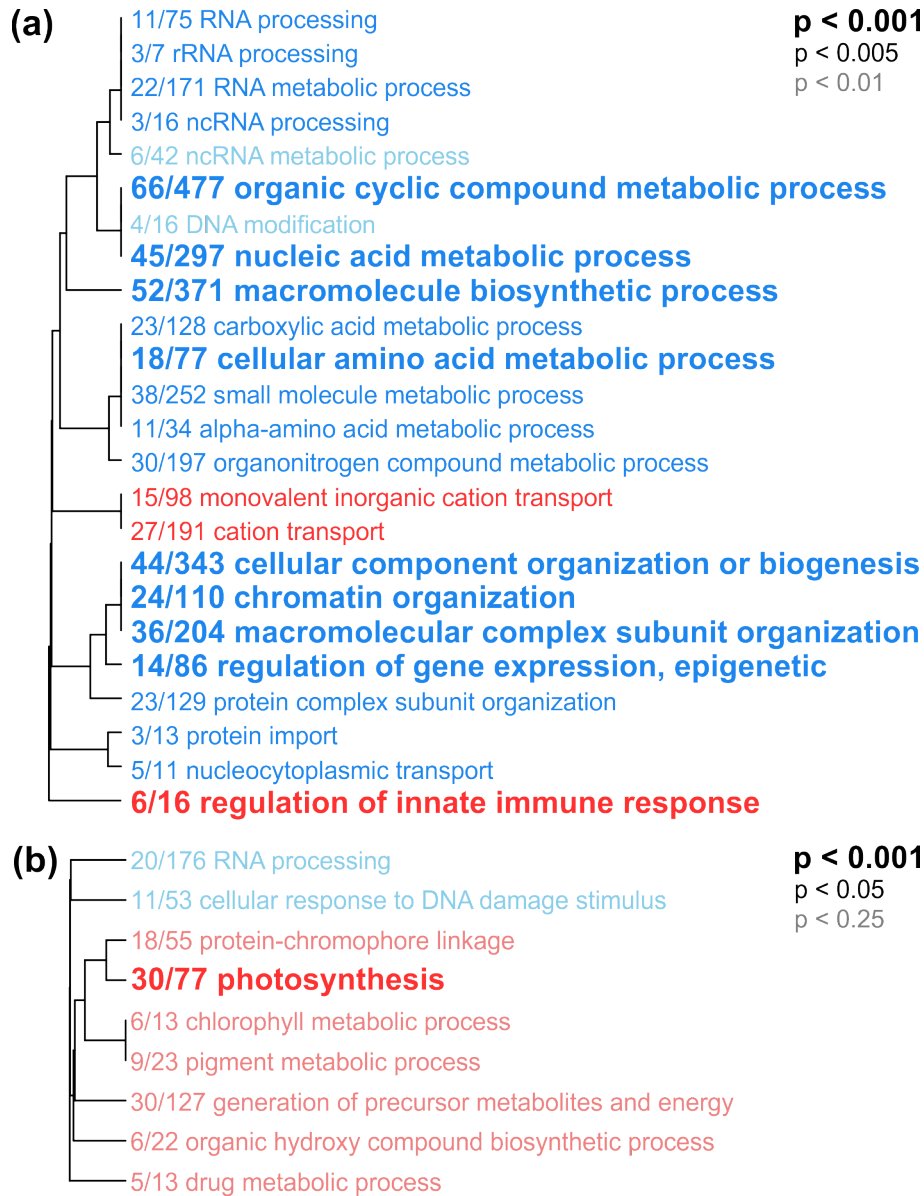

896  
897  
898  
899  
900  
901
